# Supplementary material
Source: publisher site journal article supplement (https://www.dovepress.com/article/271565)
Supplement: Supplementary file 1 [file get_supplementary_file.php]

Supplementary Figure 1

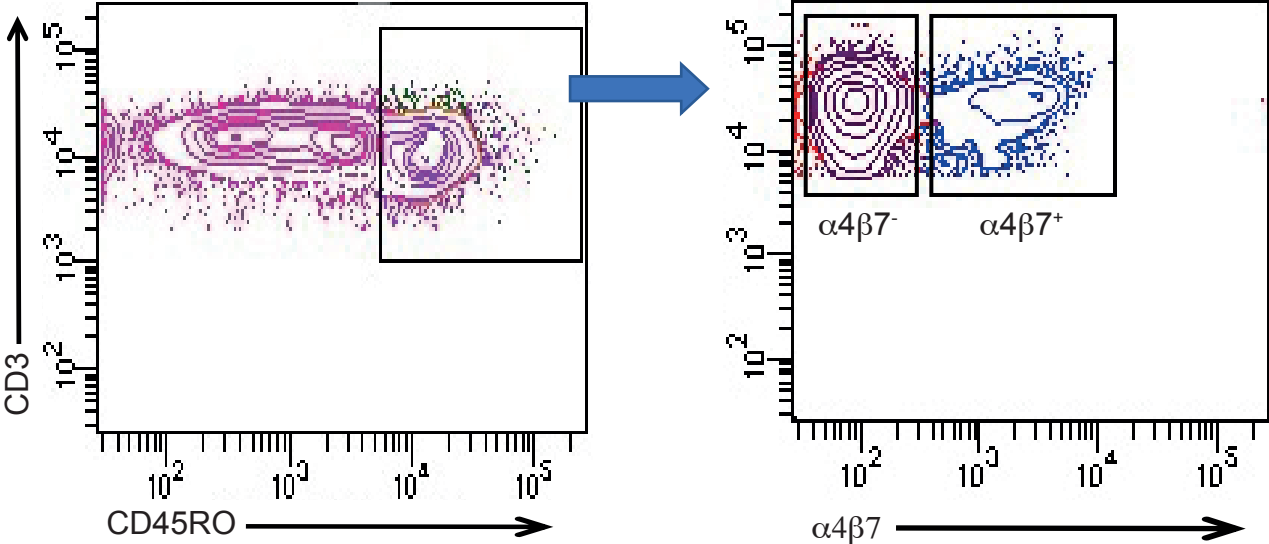

**Supplementary Table 1: Total and unique rearrangements in the three groups.** SEM, standard error of mean.

|                                      | <b>Control</b>       |                      | <b>UC</b>            |                      | <b>CD</b>           |                     |
|--------------------------------------|----------------------|----------------------|----------------------|----------------------|---------------------|---------------------|
|                                      | $\alpha 4\beta 7^-$  | $\alpha 4\beta 7^+$  | $\alpha 4\beta 7^-$  | $\alpha 4\beta 7^+$  | $\alpha 4\beta 7^-$ | $\alpha 4\beta 7^+$ |
| Total templates<br>(mean $\pm$ SEM)  | 306,313 $\pm$ 16,143 | 114,705 $\pm$ 34,072 | 258,725 $\pm$ 24,317 | 186,813 $\pm$ 19,937 | 35,555 $\pm$ 3,498  | 29,479 $\pm$ 2,794  |
| Unique templates<br>(mean $\pm$ SEM) | 138,764 $\pm$ 19,544 | 65,675 $\pm$ 16,966  | 121,900 $\pm$ 7,748  | 117,100 $\pm$ 12,581 | 21,234 $\pm$ 2,264  | 21,085 $\pm$ 2,983  |

Supplementary Table 2: Shared clones between  $\alpha 4\beta 7^-$  and  $\alpha 4\beta 7^+$  sub-populations in each group.

|                                       |    | <b>C1</b>            | <b>%</b> | <b>C2</b>           | <b>%</b> | <b>C3</b>          | <b>%</b> | <b>C4</b>          | <b>%</b> | <b>C5</b>       | <b>%</b> |
|---------------------------------------|----|----------------------|----------|---------------------|----------|--------------------|----------|--------------------|----------|-----------------|----------|
| <b><math>\alpha 4\beta 7^+</math></b> | 1  | CATSRELGGHEQYF       | 3.4%     | CASSDWRNGYTF        | 0.7%     | CASSVGGYGGYTF      | 2.7%     | CSARAVVDQPQHF      | 0.3%     | CASSSSAGAIEQYF  | 3.3%     |
|                                       | 2  | CASRERGLSNEQFF       | 2.0%     | CASSVHTEAFF         | 0.6%     | CASSYNPEPGELEFF    | 0.5%     | CASTIDPTGDRYGYTF   | 0.3%     | CASSPPSGSYEQYF  | 1.9%     |
|                                       | 3  | CASSFRDSYEQYF        | 0.9%     | CASSLAEGDYGYTF      | 0.3%     | CSAVKREVYNEQFF     | 0.5%     | CSVEDGTNEQYF       | 0.3%     | CASSLGLAGGYEQFF | 1.1%     |
|                                       | 4  | CASSYTGLAGGNEQFF     | 0.6%     | CASSSGGLAGDDTGELFF  | 0.2%     | CASSPGTGETGELFF    | 0.5%     | CASSLYGSDYEQYF     | 0.2%     | CASRAGQSEAFF    | 0.7%     |
|                                       | 5  | CASSDYITNEKLFF       | 0.6%     | CASSYNYQGSKGYTF     | 0.1%     | CASSVAGTSYEQYF     | 0.5%     | CASSLGTSGSGANVLTFF | 0.2%     | CATSRGAKNIQYF   | 0.6%     |
|                                       | 6  | CASGGQGNNGANVLTFF    | 0.6%     | CASSQEQGLDEQYF      | 0.1%     | CASSEGGDGNQPQHF    | 0.4%     | CASSHRQGENTEAFF    | 0.2%     | CASSPSLANTEAFF  | 0.5%     |
|                                       | 7  | CASSHKRTGGAETQYF     | 0.6%     | CASSEDPGANVLTFF     | 0.1%     | CASSLGGALYEQYF     | 0.3%     | CASSDQGGNQPQHF     | 0.2%     | CASSRDKGEAFF    | 0.5%     |
|                                       | 8  | CASSLGGEKLFF         | 0.6%     | CASSTQPGEKLFF       | 0.1%     | CASSPRATDEQFF      | 0.3%     | CASSYTGTSAETQYF    | 0.2%     | CASSATGTNEQFF   | 0.4%     |
|                                       | 9  | CASSLAGTYEQYF        | 0.5%     | CSAVSLFSGGKNQPQHF   | 0.1%     | CASSDGTENSPLHF     | 0.3%     | CASSGQDTGELFF      | 0.1%     | CASSLWDRNEKLFF  | 0.4%     |
|                                       | 10 | CASSEWTGKQPQHF       | 0.4%     | CASSLGLYNSPLHF      | 0.1%     | CASSEGAGGSTDTQYF   | 0.2%     | CASSSGTDAGELFF     | 0.1%     | CASRDHEQPQHF    | 0.3%     |
| <b><math>\alpha 4\beta 7^-</math></b> | 1  | CASTVNYSNQPQHF       | 1.9%     | CASSVHTEAFF         | 0.3%     | CASSVGGYGGYTF      | 0.5%     | CASSLGTSGSGANVLTFF | 0.9%     | CASSLGLAGGYEQFF | 2.2%     |
|                                       | 2  | CASSPRRSSIHENSGNTIYF | 1.4%     | CASKDRGHNSQPQHF     | 0.2%     | CASSEFAENTEAFF     | 0.2%     | CASSYTGTSAETQYF    | 0.5%     | CASRDHEQPQHF    | 1.2%     |
|                                       | 3  | CASSPNYSNQPQHF       | 0.7%     | CSVVSGGGETQYF       | 0.2%     | CSARAPSSAGYTF      | 0.2%     | CASSEGAETNTEAFF    | 0.3%     | CASSPTSASYEQYF  | 0.9%     |
|                                       | 4  | CASSPGGVSEAFF        | 0.6%     | CAWSDGTGATVGYEQYF   | 0.2%     | CASSYERSSYNEQFF    | 0.2%     | CARSLGDRVIYEQYF    | 0.2%     | CASRAGQSEAFF    | 0.9%     |
|                                       | 5  | CASSPNYSNQPQHF       | 0.4%     | CSVRDANEAFF         | 0.2%     | CASSPRTSGSLSGEEQFF | 0.2%     | CASSPRGGRANYGYTF   | 0.2%     | CASRSLEQQQFF    | 0.8%     |
|                                       | 6  | CSARDWASGVFTDTQYF    | 0.3%     | CASSPPGGRWEKLFF     | 0.1%     | CSAVKREVYNEQFF     | 0.2%     | CASMTRMGVYGYTF     | 0.2%     | CAISEGLQNYGYTF  | 0.7%     |
|                                       | 7  | CASSHKRTGGAETQYF     | 0.3%     | CASSEIAGTGGYGYTF    | 0.1%     | CASSDGTENSPLHF     | 0.1%     | CASSEGAHTEAFF      | 0.2%     | CASSPPAERKLFF   | 0.5%     |
|                                       | 8  | CASMLAGPEQFF         | 0.2%     | CASSYVPDHWYGYTF     | 0.1%     | CASSYQTGASQPQHF    | 0.1%     | CASSQYGGNEQFF      | 0.2%     | CASSRLASETQYF   | 0.3%     |
|                                       | 9  | CASSEVIGYSNQPQHF     | 0.2%     | CASSESRPAGGPSYNEQFF | 0.1%     | CASSLSTGVYEQYF     | 0.1%     | CASSGQDTGELFF      | 0.2%     | CASSTQGNEQFF    | 0.3%     |
|                                       | 10 | CASSRGRIADTQYF       | 0.2%     | CASSQSGHSGNTIYF     | 0.1%     | CASSPGTGETGELFF    | 0.1%     | CASSRLAGGNTGELFF   | 0.2%     | CASSQKLAETQYF   | 0.3%     |

|              |    | UC1               | %    | UC2                | %    | UC3               | %    | UC4              | %    | UC5                   | %    | UC6                | %    |
|--------------|----|-------------------|------|--------------------|------|-------------------|------|------------------|------|-----------------------|------|--------------------|------|
| <b>α4β7+</b> | 1  | CASSIGTAEQYF      | 2.7% | CSVEAISPWRAGGELFF  | 1.4% | CAWRVGSNTGELFF    | 0.7% | CASSYTVRPNYGYTF  | 0.6% | CASSLGQDGYTF          | 1.8% | CASSMIRPSRGPQHF    | 1.2% |
|              | 2  | CASSPPGTGDEAFF    | 1.2% | CASSGPGQAGHFNYGYTF | 0.9% | CAWSAGGVSYEQYF    | 0.4% | CSAATGGNGYTF     | 0.4% | CASSLTSYTDQYF         | 1.3% | CASSQDVQGFSEYEQYF  | 0.4% |
|              | 3  | CASSLGQAYEQYF     | 0.9% | CASTNDGNTTEAFF     | 0.8% | CASSLGPTTEAFF     | 0.4% | CASSYSGTGRGTEAFF | 0.3% | CASSLGGALTEAFF        | 1.2% | CASSIGVEQQHF       | 0.3% |
|              | 4  | CASRTTKNWNNGYTF   | 0.7% | CASPTLTGALGATEAFF  | 0.4% | CASSFIRAGTDQYF    | 0.3% | CAISTGDSNQPQHF   | 0.3% | CASSEGSNQPQHF         | 0.9% | CASSIGTDTQYF       | 0.3% |
|              | 5  | CATSWTWTGELFF     | 0.7% | CASGLDLREQYF       | 0.4% | CASSLPGANVLTFF    | 0.3% | CASSLNPNTGELFF   | 0.2% | CASSYSSQGGNIQYF       | 0.9% | CASSLRGGSPLHF      | 0.3% |
|              | 6  | CASSEGGAYEQYF     | 0.6% | CASSSGVVGPLHF      | 0.3% | CASSYSLVWLSFDEQYF | 0.3% | CASSADSLGAGELFF  | 0.2% | CASSRQSYNEQFF         | 0.8% | CASYSTEYEQYF       | 0.2% |
|              | 7  | CASSVALGTWDTQYF   | 0.6% | CASSFKQGGSYEQYF    | 0.2% | CASSPRLAGGTYEQYF  | 0.3% | CASSEKPEANEQFF   | 0.2% | CASSLGLQETQYF         | 0.6% | CASIRAVADVTIYF     | 0.2% |
|              | 8  | CASSAGQGVTEYEQYF  | 0.5% | CASSPRENTEAFF      | 0.2% | CASSQFLFEQYF      | 0.3% | CASSLGESTE AFF   | 0.1% | CASSQARAANRERANTGELFF | 0.6% | CASSIGTAEQYF       | 0.2% |
|              | 9  | CASLTVSGTPDYNEQFF | 0.4% | CASSFGTGAYGYTF     | 0.2% | CASSHVSGGAEAFF    | 0.2% | CASSARLAGPNEQFF  | 0.1% | CASGRQGWTEAFF         | 0.5% | CASSEESGSYNEQFF    | 0.2% |
|              | 10 | CASRDRMGQPQHF     | 0.4% | CASSLSPLAEAFF      | 0.2% | CASKQFSGNTIYF     | 0.2% | CASRPDLTEAFF     | 0.1% | CASSFDTYTDQYF         | 0.4% | CASSLPGGPQDEAFF    | 0.2% |
| <b>α4β7-</b> | 1  | CASSVALGTWDTQYF   | 3.1% | CASSFKQGGSYEQYF    | 0.3% | CASSFIRAGTDQYF    | 1.9% | CASSYTVRPNYGYTF  | 0.3% | CASSLGLQETQYF         | 9.5% | CASRRDNEQFF        | 0.4% |
|              | 2  | CASSQDLGGSGELFF   | 1.4% | CASSFKQGGSYEQYF    | 0.3% | CASSLFRGNTGELFF   | 1.0% | CASSFVGELFF      | 0.3% | CASSYSSQGGNIQYF       | 3.7% | CASSQEGYYGYTF      | 0.2% |
|              | 3  | CSVELWQGDYGYTF    | 1.2% | CSVEAISPWRAGGELFF  | 0.2% | CAWRVGSNTGELFF    | 1.0% | CSAATGGNGYTF     | 0.2% | CASSEVEQYHEQFF        | 3.4% | CASSFSLGQWLVFGEAFF | 0.2% |
|              | 4  | CASILSGGADTQYF    | 0.9% | CASTNDGNTTEAFF     | 0.2% | CATRDWAAGELFF     | 0.4% | CASSIITVFSNQPQHF | 0.2% | CSARDSRQETQYF         | 1.3% | CASSWGVGNQPQHF     | 0.1% |
|              | 5  | CASSHDPGLANEELFF  | 0.8% | CASSVGLAGSNTGELFF  | 0.1% | CSVVDSOSSNYEQYF   | 0.3% | CASSLNPNTGELFF   | 0.2% | CASSLGQDGYTF          | 0.8% | CASSPPRQGRSNQPQHF  | 0.1% |
|              | 6  | CASPTGQGDGELFF    | 0.8% | CASSTRGRAGTGELFF   | 0.1% | CAWSAGGVSYEQYF    | 0.3% | CSALKGRADEAFF    | 0.2% | CASSERGTGRWEQYF       | 0.7% | CASSQDVQGFSEYEQYF  | 0.1% |
|              | 7  | CASSRQGSYNEQFF    | 0.7% | CASGLDLREQYF       | 0.1% | CSASGDSNQPQHF     | 0.2% | CASSLWTDQPQHF    | 0.2% | CSAQPDRNSYEQYF        | 0.6% | CATSREYRGTEAFF     | 0.1% |
|              | 8  | CASRTGPNSEAFF     | 0.6% | CASSGPGQAGHFNYGYTF | 0.1% | CASSLPGANVLTFF    | 0.2% | CASRQQGMNTEAFF   | 0.1% | CAHEGAHGPEYEQYF       | 0.6% | CASSRSGPNYGYTF     | 0.1% |
|              | 9  | CASRTTKNWNNGYTF   | 0.6% | CSVFDRAEAFF        | 0.1% | CSVGTGRDYGYTF     | 0.2% | CASSARLAGPNEQFF  | 0.1% | CASSFDTYTDQYF         | 0.5% | CASSEGRAFF         | 0.1% |
|              | 10 | CASKDALNTEAFF     | 0.6% | CASRFKQGGSYEQYF    | 0.1% | CASSLGPTTEAFF     | 0.2% | CASSADSLGAGELFF  | 0.1% | CAIRGVGVGSSYEQYF      | 0.4% | CASSMIRPSRGPQHF    | 0.1% |

|                         |    | CD1                      | %    | CD2                | %    | CD3                     | %    | CD4                        | %    | CD5                     | %    |
|-------------------------|----|--------------------------|------|--------------------|------|-------------------------|------|----------------------------|------|-------------------------|------|
| <b>α4β7<sup>+</sup></b> | 1  | CASSSQVTGELFF            | 5.2% | <b>CASRGPGEQYF</b> | 2.7% | <b>CASNVGTFGGTEAFF</b>  | 0.4% | CASTPGLAVLEQYF             | 0.5% | <b>CASSFIASDSYEQYF</b>  | 6.4% |
|                         | 2  | <b>CASSLESGRPEYQYF</b>   | 2.9% | CASSYGDNSPLHF      | 0.7% | CASGHRGQGFTGELFF        | 0.3% | CSVEDLAGGFYEQYF            | 0.3% | <b>CAWTRPPDTEAFF</b>    | 1.2% |
|                         | 3  | <b>CASSQRAVGELFF</b>     | 2.0% | CASSPPTNYGYTF      | 0.6% | CASSYKEGGGNQPQHF        | 0.2% | <b>CASGSGQGEVADTQYF</b>    | 0.3% | <b>CASIRPGLANTGELFF</b> | 1.1% |
|                         | 4  | <b>CASSVRTVSVNEQFF</b>   | 1.4% | CASSGARLSGANVLTFF  | 0.6% | CASSRTGEGYTF            | 0.2% | CSANDRARHREWEQYF           | 0.3% | CASSYVGVGQDRSYEQYF      | 1.0% |
|                         | 5  | CASSQERRGGARETQYF        | 1.4% | CAYRPSSYEQYF       | 0.3% | CSVVLYLSTDTQYF          | 0.2% | CASSPRLTNEKLFF             | 0.3% | CASSQEVLAEPFYEQFF       | 0.9% |
|                         | 6  | CSAKGTSGVDYVEQYF         | 1.4% | CASSDSMSYSYNEQFF   | 0.2% | CSVGTGGTNEKLFF          | 0.1% | CASSYSGTGNTGELFF           | 0.3% | CASSVGQDTEAFF           | 0.9% |
|                         | 7  | <b>CASSLGGTVNTEAFF</b>   | 1.1% | CASSEGESGNTIYF     | 0.2% | CASSLAGLEKLFF           | 0.1% | CASSIGTDTQYF               | 0.2% | CASSEYGYEQYF            | 0.6% |
|                         | 8  | <b>CSVEGGQYEQYF</b>      | 1.1% | CASRDKLNTEAFF      | 0.2% | CAWSTGGSYNEQFF          | 0.1% | CAFHEPASSYEQYF             | 0.2% | CASSENSGLSPLHF          | 0.5% |
|                         | 9  | <b>CSVEGGSSYEQYF</b>     | 1.0% | CASSYGREVDTQYF     | 0.2% | <b>CASSQRTSSYNEQFF</b>  | 0.1% | <b>CASSPGTSGTNPYQETQYF</b> | 0.2% | <b>CASSYDFRGEKLFF</b>   | 0.5% |
|                         | 10 | CASSWGQGNLPLHF           | 0.7% | CASSDSAEAGELFF     | 0.2% | CATQGAYEQYF             | 0.1% | CASSIGTDTQYF               | 0.2% | CASSESTGTNYGYTF         | 0.5% |
| <b>α4β7<sup>-</sup></b> | 1  | CASGSGGTTDTQYF           | 4.3% | <b>CASRGPGEQYF</b> | 1.6% | <i>CSVVGNSGTDPYEQYF</i> | 0.5% | CASSLTGGVNTEAFF            | 1.5% | <b>CASSFIASDSYEQYF</b>  | 4.5% |
|                         | 2  | CASSFAGGHSNEQFF          | 3.6% | CASNAGYSNPQHF      | 0.9% | <b>CASNVGTFGGTEAFF</b>  | 0.2% | <b>CASSPGTSGTNPYQETQYF</b> | 0.9% | <b>CAWTRPPDTEAFF</b>    | 1.0% |
|                         | 3  | <b>CSVEGGQYEQYF</b>      | 2.8% | CSARDGRDTEAFF      | 0.4% | CSVRPGTRSTEAFF          | 0.2% | <b>CASSDRGGTGELFF</b>      | 0.7% | CASSQDHGLEGYTF          | 0.6% |
|                         | 4  | <b>CASSLGGTVNTEAFF</b>   | 2.2% | CASSFSGDNEQFF      | 0.3% | CASSLVLGNTIYF           | 0.1% | <b>CASSPGTTYEQYF</b>       | 0.5% | CASSYSDSPVSSYEQYF       | 0.6% |
|                         | 5  | CASSSRAGGMNTEAFF         | 2.0% | CASSTAPGLQETQYF    | 0.3% | CASGWASGRAGETQYF        | 0.1% | CASSPYRAGDITIYF            | 0.4% | CSASKEQNGYGYTF          | 0.6% |
|                         | 6  | <i>CASRYGGAGALSYEQYF</i> | 2.0% | CASSLGLAERSYEQYF   | 0.3% | CASSNRVNSPLHF           | 0.1% | CASSERGGGNTEAFF            | 0.3% | <b>CASIRPGLANTGELFF</b> | 0.5% |
|                         | 7  | <b>CSVEGGSSYEQYF</b>     | 2.0% | CASSPLNGYGEPQHF    | 0.2% | CASSQAETQYF             | 0.1% | CASSVLTSTDTQYF             | 0.3% | CASSPRVHGTYF            | 0.4% |
|                         | 8  | CASSLGNQGRTEQYF          | 1.7% | CASSDRDTGELFF      | 0.2% | CASSELSGGDEKLFF         | 0.1% | CASSEGGMAGYQETQYF          | 0.2% | CASSLEVVALNYGYTF        | 0.4% |
|                         | 9  | CASSQERRGGARETQYF        | 1.5% | CASSPLDSQPQHF      | 0.2% | CASSQPGTEAFF            | 0.1% | CASSPPGGGMDEQYF            | 0.2% | <b>CASSYDFRGEKLFF</b>   | 0.4% |
|                         | 10 | <b>CASSLESGRPEYQYF</b>   | 1.4% | CSAGTGDEAFF        | 0.2% | <b>CASSQRTSSYNEQFF</b>  | 0.1% | <b>CASGSGQGEVADTQYF</b>    | 0.2% | CAWSPPLAVNEQFF          | 0.4% |
